# Supplementary material
Source: publisher figshare collection journal article supplement (https://acs.figshare.com/ndownloader/files/7563679)

## Interaction of Zika Virus Envelope Protein with Glycosaminoglycans

So Young Kim, Jing Zhao, Xinyue Liu, Keith Fraser, Lei Lin, Xing Zhang, Fuming Zhang,  
Jonathan S. Dordick, Robert J. Linhardt

### Supporting Information for Publication

**Figure S1.** Multiple sequence alignment (MSA) of flavivirus envelope proteins generated using MSAAviewer and a BLOSUM62 scoring matrix.<sup>90</sup>. Putative GAG binding sites are boxed in red (GAG binding site I) and green (GAG binding site II). The sequence alignment of the full-length envelope proteins from ZIKV, DENV 1-4, WNV, and YFV are presented with residues aligned and color coded based on their percent identity. The greatest percent identity is represented in the darkest shade of blue, which transits to lighter shades of blue, gray, and finally white to represent the lowest percent identity amongst flavivirus envelope proteins.

**Figure S2.** Polyacrylamide gel electrophoresis (PAGE) analysis for the HS decasaccharide library used in the ‘fishing’ experiment. Lane 1: heparin oligosaccharide standards; Lane 2: HS dp10.

**Figure S3.** Instrumental error in analysis of HS and CS standards. Seventeen disaccharide standards were mixed and AMAC-labeled into 12.5 ng/μL. Three injections were used to calculate the standard derivations. Extracted ion chromatograms (EICs) were used to perform peak integration. The calibration constants were calculated as:  $\frac{\text{Injection amount (ng)}}{\text{Peak Area}} \times 10^5$ .

Figure S1

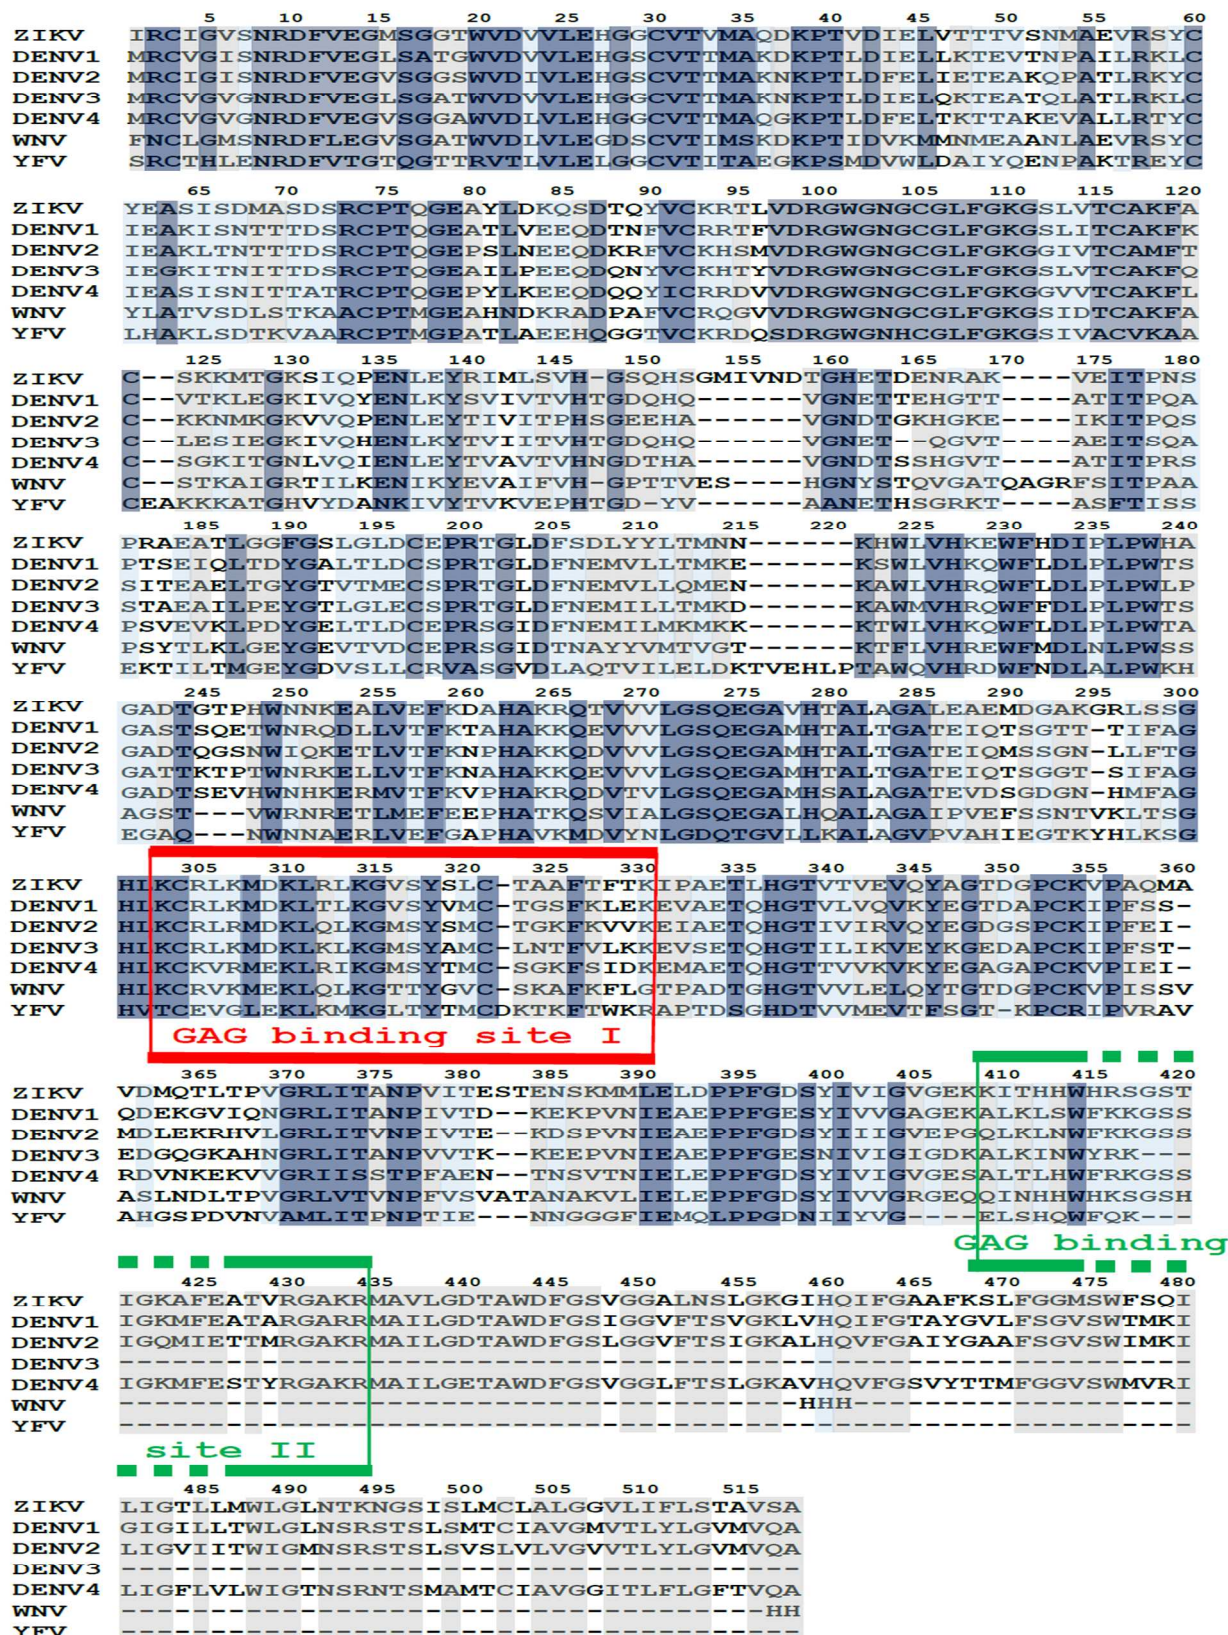

**Figure S2**

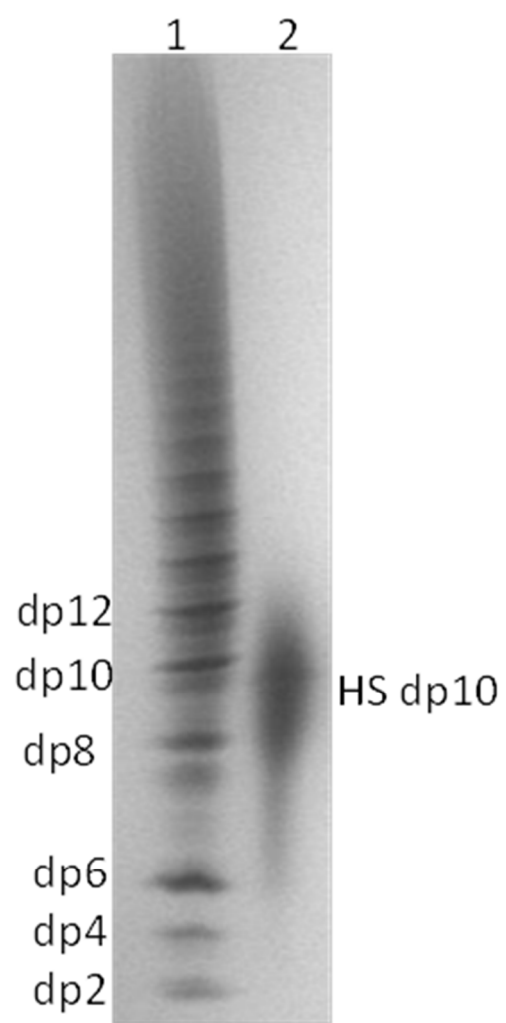

Figure S3

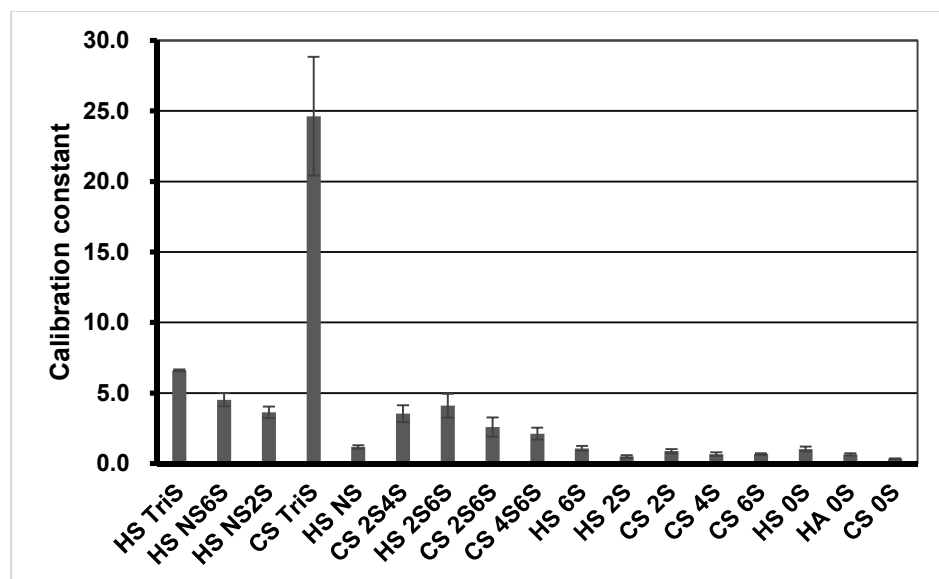

Supplement: Supplementary file 1 [file 7563679]
